# Supplementary material for: Effects of Short-Term Lenvatinib Administration Prior to Transarterial Chemoembolization for Hepatocellular Carcinoma
Source: MDPI journal article supplement (doi:10.3390/cancers16091624), 2024-04-23
Supplement: s1 [file s1]

**Table S1.** The clinical characteristics of patients undergoing cTACE or DEB-TACE in short-term LEN-TACE.

| Characteristic                 | cTACE ( <i>n</i> = 19) | DEB-TACE ( <i>n</i> = 6) | <i>P</i> value |
|--------------------------------|------------------------|--------------------------|----------------|
| Age, median (range), years     | 79 (63-90)             | 84.5 (68-89)             | 0.48           |
| Weight, median (range), kg     | 59.2 (44.5-89.8)       | 57.3 (45.0-65.1)         | 0.23           |
| Sex Male, %                    | 13 (68.4)              | 5 (83.3)                 | 0.64           |
| Etiology, %                    |                        |                          |                |
| Hepatitis B                    | 1 (5.3)                | 1 (16.7)                 | 0.18           |
| Hepatitis C                    | 7 (36.8)               | 0 (0)                    |                |
| Non-B non-C                    | 11 (57.9)              | 5 (83.3)                 |                |
| Child-Pugh stage, %            |                        |                          |                |
| A                              | 18 (94.7)              | 4 (66.7)                 | 0.13           |
| B                              | 1 (5.3)                | 2 (33.3)                 |                |
| mALBI grade, %                 |                        |                          |                |
| 1,2a                           | 13 (68.4)              | 3 (50.0)                 | 0.63           |
| 2b                             | 6 (5.3)                | 3 (50.0)                 |                |
| AFP , %                        |                        |                          |                |
| <200 ng/mL                     | 16 (84.2)              | 4 (66.7)                 | 0.73           |
| ≥200 ng/mL                     | 3 (15.8)               | 2 (33.3)                 |                |
| tumor size, median (range), mm | 21 (11-63)             | 73.5 (12-108)            | <0.05*         |
| tumor number, median(range)    | 1 (1-4)                | 1 (1-15)                 | 0.78           |
| Liver cancer staging, %        |                        |                          |                |
| early                          | 14 (73.7)              | 1 (16.7)                 | <0.05*         |
| intermeidate                   | 5 (26.3)               | 5 (83.3)                 |                |

**Table S2.** Univariate analyses of clinical characteristics associated with CR rate and PFS.

| Variable                                   | CR rate (4 weeks after the first TACE) |                | PFS                  |                |
|--------------------------------------------|----------------------------------------|----------------|----------------------|----------------|
|                                            | OR(95%CI)                              | <i>p</i> value | HR(95%CI)            | <i>p</i> value |
| Etiology(virus / non-virus)                | 0.875(0.116-6.579)                     | 0.897          | 2.021(0.225-18.146)  | 0.530          |
| Child-Pugh(A / B)                          | 0.471(0.034-6.568)                     | 0.575          | 0.408(0.045-3.706)   | 0.426          |
| mALBI(1,2a / 2b)                           | 0.875(0.116-6.579)                     | 0.897          | 0.390(0.065-2.350)   | 0.304          |
| AFP(<200ng/ml / ≥200ng/ml)                 | 1.067(0.092-12.401)                    | 0.959          | 0.226(0.035-1.452)   | 0.117          |
| Tumor size(<50mm / ≥50mm)                  | 0.078(0.008-0.792)                     | 0.031          | 0.438(0.043-4.463)   | 0.486          |
| Tumor number(1 / ≥2)                       | 0.917(0.123-6.825)                     | 0.932          | 1.702(0.283-10.240)  | 0.561          |
| Liver cancer staging(early / intermediate) | 0.089(0.008-1.002)                     | 0.050          | 0.680(0.112-4.123)   | 0.675          |
| TACE(cTACE / DEB-TACE)                     | 3.556(0.405-31.233)                    | 0.253          | 0.3872(0.623-24.047) | 0.146          |
